# Supplementary material for: Consenting to health record linkage: evidence from a multi-purpose longitudinal survey of a general population
Source: BMC Health Serv Res. 2012 Mar 5;12:52. doi: 10.1186/1472-6963-12-52 (PMC3330014; doi:10.1186/1472-6963-12-52)
Supplement: Additional file 2 — Table S2. Multivariate logistic regression of consent to link administrative health records. [file 1472-6963-12-52-S2.XLSX]

## Sheet: Table 2
Table 2 - Multivariate logistic regression of consent to link administrative health records.
Participant characteristics	Odds Ratio	95% confidence interval
Set 1: Demographic characteristics
Country of residence (comparison group: England)
Wales	0.7	(0.62 - 0.79)**
Scotland	0.77	(0.68 - 0.87)**
Northern Ireland	0.79	(0.69 - 0.89)**
Age group (comparison group: 60 or older)
Age 16-24	1.61	(1.26 - 2.06)**
Age 25-39	1.18	(0.99 - 1.42)
Age 40-49	1.04	(0.87 - 1.25)
Age 50-59	1.04	(0.88 - 1.23)
Male	1.14	(1.02 - 1.27)*
British/Irish White	1.75	(1.46 - 2.11)**
Set 2: Socio-economic characteristics
Has higher degree	1.52	(1.14 - 2.01)**
Household type (comparison group: Single)
Couple without children	0.91	(0.77 - 1.07)
Couple with children	0.91	(0.76 - 1.10)
Lone parent	0.98	(0.78 - 1.24)
Other	1.16	(0.82 - 1.65)
Quartile of household income (comparison group: 1st quartile)
2nd quartile	0.92	(0.79 - 1.07)
3rd quartile	1.07	(0.90 - 1.26)
Top quartile	0.91	(0.76 - 1.09)
Set 3: Health conditions
Considers self to be disabled	0.94	(0.78 - 1.14)
Has health problem(s)	1.16	(1.00 - 1.35)
Health problem relates to …
Arms	0.93	(0.81 - 1.06)
Sight	1.12	(0.90 - 1.40)
Hearing	1.16	(0.97 - 1.39)
Allergy	1.08	(0.92 - 1.28)
Chest	1	(0.86 - 1.17)
Heart	0.94	(0.81 - 1.09)
Stomach	1.07	(0.88 - 1.30)
Diabetes	1.3	(1.03 - 1.64)*
Anxiety	0.83	(0.68 - 1.01)
Alcohol	1.13	(0.50 - 2.57)
Epilepsy	0.86	(0.49 - 1.50)
Migraine	1.08	(0.87 - 1.32)
Cancer	1.31	(0.88 - 1.96)
Stroke	1.06	(0.68 - 1.67)
Other health problem	0.95	(0.76 - 1.20)
Weight (comparison group: underweight)
Normal weight	0.82	(0.58 - 1.17)
Overweight	0.87	(0.61 - 1.25)
Obese	1.05	(0.73 - 1.53)
Set 4: Use of health services
Covered by private medical insurance	1.07	(0.93 - 1.23)
Used health services (last 12 months)	1.15	(1.02 - 1.30)*
Had a health check	1.06	(0.88 - 1.27)
Has visited GP (last 12 months)	0.84	(0.73 - 0.95)**
Out-patient (last 12 months)	0.96	(0.82 - 1.12)
Hospital in-patient (last 12 months)	1.05	(0.86 - 1.27)
Hospital in-patient at least once (previous 17 years)	1.24	(1.02 - 1.52)*
Hospital in-patient at least once but never for childbirth (previous 17 years)	0.87	(0.72 - 1.06)
Significant at *** .001, ** .01, * .05.
Source: British Household Panel Study Wave 18. N=11 021. F( 45, 8376) = 3.28, p<.001.
